# Supplementary material
Source: PubMed Central journal article supplement (PMC4970594)
Supplement: 10.1164_rccm.201506-1256OC_ferrante_data_supplement.pdf [file 10.1164_rccm.201506-1256OC_ferrante_data_supplement.pdf]

**Title:** Factors Associated with Functional Recovery Among Older ICU Survivors

**Authors:** Lauren E. Ferrante, Margaret A. Pisani, Terrence E. Murphy, Evelyne A. Gahbauer,  
Linda S. Leo-Summers, and Thomas M. Gill

ONLINE DATA SUPPLEMENT

| <b>Table S1.</b> Sensitivity of Significant Associations with Functional Recovery to Censoring under Assumptions of Missing at Random and Missing Not at Random |                                                        |                                  |                 |                           |                   |
|-----------------------------------------------------------------------------------------------------------------------------------------------------------------|--------------------------------------------------------|----------------------------------|-----------------|---------------------------|-------------------|
| Datasets Used in Model of Time to Functional Recovery within Six Months of ICU Admission (N=218* in each case)                                                  | Rate of Recovery Among 35 Decedents Censored by Death† | Hazard Ratios ( <i>p</i> -value) |                 |                           |                   |
|                                                                                                                                                                 |                                                        | BMI                              | Self - Efficacy | Severe Hearing Impairment | Vision Impairment |
| All Person-Admissions with 35 decedents not imputed (results reported in manuscript)                                                                            | 0% among the 35 censored by death                      | 1.07 (0.003)                     | 1.05 (0.002)    | 0.38 (<0.001)             | 0.59 (0.031)      |
| All 35 decedents set to non-recovery with censoring at six months                                                                                               | 0% among the 35 censored by death                      | 1.08 (<0.001)                    | 1.05 (<0.001)   | 0.41 (<0.001)             | 0.58 (0.015)      |
| MAR Imputations‡ of time to recovery and its occurrence                                                                                                         | 41% among the 35 censored by death                     | 1.06 (0.021)                     | 1.04 (0.008)    | 0.44 (0.005)              | 0.61 (0.032)      |
| MNAR Imputations‡ of time to recovery and its occurrence (shift=0.8 and sigma=0.2)                                                                              | 55% among the 35 censored by death                     | 1.06 (0.017)                     | 1.04 (0.024)    | 0.47 (0.012)              | 0.61 (0.038)      |
| MNAR Imputations‡ of time to recovery and its occurrence (shift=1.5 and sigma=0.5)                                                                              | 63% among the 35 censored by death                     | 1.05 (0.029)                     | 1.04 (0.021)    | 0.49 (0.012)              | 0.63 (0.049)      |
| MNAR Imputations‡ of time to recovery and its occurrence (shift=2.0 and sigma=0.5)                                                                              | 69% among the 35 censored by death                     | 1.05 (0.036)                     | 1.03 (0.028)    | 0.50 (0.013)              | 0.62 (0.054)      |
| All 35 decedents set to recovery at time of censoring by death                                                                                                  | 100% among the 35 censored by death                    | 1.03 (0.118)                     | 1.02 (0.077)    | 0.56 (0.015)              | 0.72 (0.114)      |

Abbreviations: MAR, missing at random; MNAR, missing not at random; ICU, intensive care unit

\* The 218 ICU admissions were contributed by 186 participants.

† Among the 183 not censored by death, there was a fixed rate of recovery (62%) in all cases.

‡ Point estimates and *p*-values calculated with SAS PROC MIanalyze from ten imputations.

**Table S2.** Multivariable Associations of Potential Predictors of Functional Recovery Within Six Months of ICU Admission in Older Adults from All Admissions and First Admissions Only

| Potential Predictor                 | Cause-Specific Proportional Hazards Models |         |                          |         |
|-------------------------------------|--------------------------------------------|---------|--------------------------|---------|
|                                     | All Admissions (N=218)                     |         | First Admissions (N=186) |         |
|                                     | HR (95% CI)                                | p-value | HR (95% CI)              | p-value |
| Age (in years)                      | 1.02 (0.97, 1.07)                          | 0.454   | 1.00 (0.96, 1.05)        | 0.871   |
| Female sex                          | 0.59 (0.35, 0.99)                          | 0.049   | 0.63 (0.40, 0.98)        | 0.042   |
| Non-Hispanic white                  | 1.24 (0.59, 2.63)                          | 0.571   | 1.10 (0.58, 2.07)        | 0.778   |
| Increase in Disability              | 0.80 (0.74, 0.88)                          | <0.001  | 0.82 (0.75, 0.89)        | <0.001  |
| Severe hearing impairment           | 0.38 (0.22, 0.66)                          | <0.001  | 0.39 (0.23, 0.67)        | <0.001  |
| Vision impairment                   | 0.59 (0.37, 0.95)                          | 0.031   | 0.64 (0.41, 0.98)        | 0.040   |
| Body mass index, per unit increase  | 1.07 (1.03, 1.12)                          | 0.003   | 1.06 (1.02, 1.10)        | 0.003   |
| Functional self-efficacy, per point | 1.05 (1.02, 1.08)                          | 0.002   | 1.04 (1.01, 1.07)        | 0.006   |
